# Supplementary material
Source: publisher figshare collection journal article supplement (https://diabetesjournals.figshare.com/ndownloader/files/31455580)

## Online-Only Supplemental Material

### List of contents:

Supplementary Table 1. Characterization of 4-year change category for each lifestyle factor

Supplementary Table 2. Associations between 4-year change in lifestyle in mid-life and weight change, stratified by history of GDM

Supplementary Table 3. Joint associations of 4-year change in diet and physical activity with weight change, stratified by history of GDM

Supplementary Table 4. Associations between 4-year change in lifestyle in mid-life and weight change restricting to women with baseline BMI  $\geq 25$  kg/m<sup>2</sup>, stratified by history of GDM

Supplementary Table 5. Joint associations of 4-year change in diet and physical activity with weight change restricting to women with baseline BMI  $\geq 25$  kg/m<sup>2</sup>, stratified by history of GDM (other results not shown)

Supplementary Figure 1. Trends in diet quality (AHEI), physical activity, alcohol consumption, and current smoking (%) by history of GDM during study follow-up.

Footnote: Mean follow-up time: 12.2 years for GDM and 13.4 years for non-GDM. Top and bottom dotted line indicates values of the population 25<sup>th</sup> and the 75<sup>th</sup> percentiles, respectively.

**Supplementary Table 1.** Characterization of 4-year change category for each lifestyle factor

| Lifestyle factor                    | 4-year change              |                       |
|-------------------------------------|----------------------------|-----------------------|
|                                     | Baseline cycle             | Following cycle       |
| Diet quality (AHEI)*                |                            |                       |
| Stay low                            | Tertile 1                  | Tertile 1             |
| Low to medium                       | Tertile 1                  | Tertile 2             |
| Low to high                         | Tertile 1                  | Tertile 3             |
| Stay medium                         | Tertile 2                  | Tertile 2             |
| Medium to low                       | Tertile 2                  | Tertile 1             |
| Medium to high                      | Tertile 2                  | Tertile 3             |
| Stay high                           | Tertile 3                  | Tertile 3             |
| High to medium                      | Tertile 3                  | Tertile 2             |
| High to low                         | Tertile 3                  | Tertile 1             |
| Physical activity (MET-hr/week)†    |                            |                       |
| Stay low                            | <7.5                       | <7.5                  |
| Increase                            | <7.5                       | ≥7.5                  |
| Stay high                           | ≥7.5                       | ≥7.5                  |
| Decrease                            | ≥7.5                       | <7.5                  |
| Alcohol consumption (serving/d)     |                            |                       |
| Non-drinker                         | Zero                       | Zero                  |
| Recent starter                      | Zero                       | Non-zero              |
| Recent quitter                      | Non-zero                   | Zero                  |
| Stable drinker                      | Non-zero remained constant |                       |
| Drinker with increasing consumption | Non-zero                   | Greater than baseline |
| Drinker with decreasing consumption | Non-zero                   | Lower than baseline   |
| Smoking status                      |                            |                       |
| Never smoker                        | Never                      | Never                 |
| Recent starter                      | Never                      | Current               |
| Past smoker                         | Past                       | Past                  |
| Re-starter                          | Past                       | Current               |
| Recent quitter                      | Current                    | Past                  |
| Continued smoker                    | Current                    | Current               |

Abbreviations: AHEI, Alternate Healthy Eating Index.

\* Median was 42.9, 55.3, and 69.5 for AHEI tertile 1, tertile 2, and tertile 3 group, respectively.

† 7.5 MET-hr/week is equivalent to 150 min/week of moderate-intensity physical activity.

**Supplementary Table 2.** Associations between 4-year change in lifestyle in mid-life and weight change, stratified by history of GDM

| Change in lifestyle                | LS means of 4-year weight change (kg), 95% CI* |                                          |                                |                                          |
|------------------------------------|------------------------------------------------|------------------------------------------|--------------------------------|------------------------------------------|
|                                    | No history of GDM (n=51,174, 94.7%)            |                                          | History of GDM (n=2,888, 5.3%) |                                          |
|                                    | Mean follow-up: 13.4 yrs                       |                                          | Mean follow-up: 12.2 yrs       |                                          |
|                                    | n*                                             | Weight change, mean (SD):<br>1.33 (6.31) | n                              | Weight change, mean (SD):<br>1.10 (7.55) |
| <b>Change in AHEI</b>              |                                                |                                          |                                |                                          |
| Low to high                        | 3,921                                          | -1.19 (-1.41, -0.96)                     | 213                            | -2.97 (-4.34, -1.60)                     |
| Low to medium                      | 14,626                                         | 0.55 (0.45, 0.66)                        | 806                            | -0.43 (-1.00, 0.14)                      |
| Medium to high                     | 14,702                                         | 0.21 (0.12, 0.31)                        | 731                            | -0.07 (-0.57, 0.42)                      |
| Stay high                          | 36,629                                         | 1.02 (0.98, 1.07)                        | 1,726                          | 0.68 (0.44, 0.93)                        |
| Stay medium                        | 25,156                                         | 1.41 (1.35, 1.48)                        | 1,232                          | 1.04 (0.68, 1.39)                        |
| Stay low                           | 35,079                                         | 1.73 (1.68, 1.79)                        | 1,978                          | 1.78 (1.51, 2.05)                        |
| Medium to low                      | 14,619                                         | 2.34 (2.24, 2.44)                        | 865                            | 2.49 (2.00, 2.99)                        |
| High to medium                     | 14,655                                         | 2.13 (2.04, 2.23)                        | 729                            | 2.17 (1.70, 2.63)                        |
| High to low                        | 3,335                                          | 3.41 (3.16, 3.66)                        | 157                            | 4.01 (2.78, 5.23)                        |
| <i>p</i> -value†                   |                                                | <0.001                                   |                                | <0.001                                   |
| Overall <i>p</i> -heterogeneity‡   |                                                |                                          |                                | 0.04                                     |
| <b>Change in physical activity</b> |                                                |                                          |                                |                                          |
| Increase                           | 13,705                                         | 0.90 (0.80, 1.01)                        | 788                            | 0.26 (-0.25, 0.77)                       |
| Stay high                          | 105,022                                        | 1.14 (1.11, 1.17)                        | 5,009                          | 0.99 (0.83, 1.15)                        |
| Stay low                           | 31,555                                         | 1.79 (1.73, 1.86)                        | 1,967                          | 1.28 (0.96, 1.60)                        |
| Decrease                           | 12,440                                         | 2.31 (2.20, 2.42)                        | 673                            | 2.49 (1.93, 3.04)                        |
| <i>p</i> -value                    |                                                | <0.001                                   |                                | <0.001                                   |
| Overall <i>p</i> -heterogeneity    |                                                |                                          |                                | 0.02                                     |
| <b>Status of alcohol drinking§</b> |                                                |                                          |                                |                                          |
| Non-drinker                        | 45,214                                         | 1.40 (1.35, 1.45)                        | 2,830                          | 1.23 (1.01, 1.46)                        |

|                                     |         |                     |       |                    |
|-------------------------------------|---------|---------------------|-------|--------------------|
| Recent starter                      | 12,980  | 1.38 (1.27, 1.49)   | 721   | 0.70 (0.15, 1.26)  |
| Recent quitter                      | 9,485   | 1.28 (1.13, 1.42)   | 538   | 0.84 (0.12, 1.56)  |
| Stable drinker                      | 40,045  | 1.32 (1.25, 1.40)   | 1,734 | 0.98 (0.62, 1.34)  |
| Drinker with increasing consumption | 32,314  | 1.32 (1.27, 1.37)   | 1,503 | 1.24 (0.94, 1.53)  |
| Drinker with decreasing consumption | 16,241  | 1.31 (1.25, 1.37)   | 780   | 0.93 (0.61, 1.25)  |
| <i>p</i> -value                     |         | 0.16                |       | 0.31               |
| Overall <i>p</i> -heterogeneity     |         |                     |       | 0.32               |
| <b>Change in smoking status</b>     |         |                     |       |                    |
| Never smoker                        | 107,878 | 1.31 (1.28, 1.33)   | 5,673 | 1.11 (0.96, 1.25)  |
| Recent starter                      | 263     | 0.96 (0.10, 1.83)   | 14    | 0.27 (-3.04, 3.58) |
| Past smoker                         | 41,576  | 1.34 (1.30, 1.39)   | 2,157 | 0.90 (0.64, 1.16)  |
| Re-starter                          | 1,333   | -0.21 (-0.56, 0.14) | 60    | 0.94 (-1.88, 3.77) |
| Recent quitter                      | 3,035   | 3.85 (3.60, 4.11)   | 151   | 4.38 (3.15, 5.60)  |
| Continued smoker                    | 8,637   | 1.04 (0.93, 1.14)   | 382   | 1.03 (0.38, 1.67)  |
| <i>p</i> -value                     |         | <0.001              |       | <0.001             |
| Overall <i>p</i> -heterogeneity     |         |                     |       | 0.34               |

Abbreviations: AHEI, Alternate Healthy Eating Index; BMI, body mass index; CI, confidence interval; GDM, gestational diabetes mellitus; HRT, hormonal replacement therapy; LS, least squares.

\* LS means of weight change were modeled in the multivariable marginal models with generalized estimating equations adjusting for follow-up period, race (white, non-white), marital status (ever married, others), family history of diabetes (yes, no), age (years), BMI (underweight <18.5 kg/m<sup>2</sup>, normal 18.5-24.9 kg/m<sup>2</sup>, overweight 25-29.9 kg/m<sup>2</sup>, obese ≥30.0 kg/m<sup>2</sup>), oral contraceptive use (current, past, never), menopausal and HRT use status (premenopausal never HRT use, postmenopausal never HRT use, postmenopausal current HRT use, postmenopausal past HRT use, missing), sleep duration (≤6 hours, 7-8 hours, >8 hours), and concurrent changes in the other lifestyle factors (continuous change in AHEI score including alcohol, continuous change in physical activities in MET-hr/week, categorical change in smoking status) depending on the model. There was a total of 8,437 and 162,722 4-year observations from GDM and non-GDM women, respectively, during follow-up period. Number of observations for each change category was presented within status of GDM history.

† P-value from the generalized score statistics for the lifestyle of interest in the stratified analysis by history of GDM was presented.

‡ P-value from the generalized score statistics for the interaction term between the lifestyle and history of GDM was presented.

§ AHEI without component of alcohol was adjusted in the models for change in alcohol consumption.

**Supplementary Table 3.** Joint associations of 4-year change in diet and physical activity with weight change, stratified by history of GDM

| LS means of 4-year weight change (kg), 95% CI* |       |                      |        |                      |        |                      |       |                     |
|------------------------------------------------|-------|----------------------|--------|----------------------|--------|----------------------|-------|---------------------|
| No history of GDM (n=51,174)                   |       |                      |        |                      |        |                      |       |                     |
| Change in AHEI                                 | n†    | PA increase          | n      | PA stay high         | n      | PA stay low          | n     | PA decrease         |
| Low to high                                    | 403   | -2.90 (-3.73, -2.07) | 2,536  | -0.99 (-1.25, -0.73) | 717    | -1.35 (-1.97, -0.74) | 265   | -0.37 (-1.23, 0.48) |
| Low to medium                                  | 1,473 | 0.01 (-0.35, 0.36)   | 8,548  | 0.56 (0.44, 0.68)    | 3,429  | 0.47 (0.22, 0.72)    | 1,176 | 1.48 (1.13, 1.83)   |
| Medium to high                                 | 1,175 | -0.96 (-1.35, -0.57) | 10,634 | 0.17 (0.06, 0.27)    | 1,963  | 0.51 (0.20, 0.81)    | 930   | 1.19 (0.79, 1.59)   |
| Stay high                                      | 2,033 | 0.61 (0.35, 0.86)    | 29,504 | 0.88 (0.83, 0.93)    | 3,052  | 1.54 (1.33, 1.75)    | 2,040 | 2.34 (2.08, 2.60)   |
| Stay medium                                    | 2,191 | 0.74 (0.46, 1.01)    | 16,369 | 1.24 (1.17, 1.32)    | 4,562  | 1.83 (1.65, 2.00)    | 2,034 | 2.58 (2.29, 2.87)   |
| Stay low                                       | 3,725 | 1.32 (1.12, 1.51)    | 16,863 | 1.47 (1.39, 1.54)    | 11,300 | 2.12 (2.01, 2.23)    | 3,191 | 2.46 (2.24, 2.68)   |
| Medium to low                                  | 1,370 | 2.28 (1.96, 2.61)    | 8,241  | 2.01 (1.88, 2.13)    | 3,660  | 2.82 (2.59, 3.05)    | 1,348 | 3.38 (3.04, 3.73)   |
| High to medium                                 | 1,050 | 2.20 (1.83, 2.57)    | 10,343 | 1.93 (1.83, 2.04)    | 2,140  | 2.82 (2.52, 3.13)    | 1,122 | 2.73 (2.35, 3.11)   |
| High to low                                    | 285   | 3.07 (2.33, 3.82)    | 1,984  | 3.00 (2.71, 3.28)    | 732    | 4.47 (3.84, 5.10)    | 334   | 4.16 (3.22, 5.09)   |
| History of GDM (n=2,888)                       |       |                      |        |                      |        |                      |       |                     |
| Change in AHEI                                 | n     | PA increase          | n      | PA stay high         | n      | PA stay low          | n     | PA decrease         |
| Low to high                                    | 27    | -5.59 (-8.60, -2.58) | 129    | -3.16 (-4.99, -1.33) | 49     | -1.71 (-4.63, 1.22)  | 8     | -0.40 (-4.35, 3.55) |
| Low to medium                                  | 82    | -0.96 (-2.55, 0.63)  | 444    | -0.41 (-1.12, 0.29)  | 216    | -0.55 (-1.75, 0.66)  | 64    | 0.33 (-2.44, 3.10)  |
| Medium to high                                 | 56    | -0.58 (-2.55, 1.39)  | 496    | 0.14 (-0.37, 0.65)   | 120    | -1.48 (-3.15, 0.19)  | 59    | 1.22 (-0.69, 3.14)  |
| Stay high                                      | 118   | 0.12 (-1.14, 1.37)   | 1,309  | 0.48 (0.21, 0.76)    | 193    | 1.21 (0.27, 2.15)    | 106   | 2.58 (1.50, 3.65)   |
| Stay medium                                    | 130   | 1.50 (0.56, 2.43)    | 745    | 0.95 (0.54, 1.35)    | 254    | 0.42 (-0.61, 1.44)   | 103   | 2.52 (1.04, 4.00)   |
| Stay low                                       | 200   | 0.05 (-1.10, 1.20)   | 890    | 1.82 (1.42, 2.21)    | 724    | 2.19 (1.69, 2.68)    | 164   | 2.18 (1.15, 3.20)   |
| Medium to low                                  | 95    | 2.00 (0.48, 3.52)    | 428    | 2.37 (1.75, 2.98)    | 251    | 1.97 (0.83, 3.11)    | 91    | 5.27 (4.10, 6.44)   |
| High to medium                                 | 65    | 0.49 (-1.23, 2.22)   | 485    | 1.84 (1.31, 2.37)    | 121    | 3.45 (2.24, 4.67)    | 58    | 4.26 (2.45, 6.06)   |
| High to low                                    | 15    | 0.40 (-2.83, 3.63)   | 83     | 4.50 (2.85, 6.14)    | 39     | 4.74 (2.40, 7.08)    | 20    | 3.83 (-0.20, 7.85)  |
| Overall <i>p</i> -heterogeneity by GDM‡        | 0.28  |                      |        |                      |        |                      |       |                     |

Abbreviations: AHEI, Alternate Healthy Eating Index; BMI, body mass index; CI, confidence interval; GDM, gestational diabetes mellitus; HRT, hormonal replacement therapy; LS, least squares; PA, physical activity.

\* LS means of weight change were modeled in the multivariable marginal models with generalized estimating equations adjusting for follow-up period, race (white, non-white), marital status (ever married, others), family history of diabetes (yes, no), age (years), BMI (underweight <18.5 kg/m<sup>2</sup>, normal 18.5-24.9 kg/m<sup>2</sup>, overweight 25-29.9 kg/m<sup>2</sup>, obese ≥30.0 kg/m<sup>2</sup>), oral contraceptive use (current, past, never), menopausal and HRT use status (premenopausal never HRT use, postmenopausal never HRT use, postmenopausal current HRT use, postmenopausal past HRT use, missing), sleep duration (≤6 hours, 7-8 hours, >8 hours), and categorical change in smoking status.

† There was a total of 8,437 and 162,722 4-year observations from GDM and non-GDM women, respectively, during follow-up period. Number of observations for each joint change category was presented within status of GDM history.

‡ P-value from the generalized score statistics for the interaction term between categorical joint variables of AHEI and PA and history of GDM status was presented.

**Supplementary Table 4.** Associations between 4-year change in lifestyle in mid-life and weight change restricting to women with baseline BMI  $\geq 25$  kg/m<sup>2</sup>, stratified by history of GDM

|                                     | LS means of 4-year weight change (kg), 95% CI* |                      |                          |                      |
|-------------------------------------|------------------------------------------------|----------------------|--------------------------|----------------------|
|                                     | No history of GDM (n=30,180)                   |                      | History of GDM (n=2,067) |                      |
| BMI (kg/m <sup>2</sup> ), mean (SD) | 30.63 (5.19)                                   |                      | 31.94 (5.93)             |                      |
| Mean weight change (kg), mean (SD)  | 0.90 (7.90)                                    |                      | 0.62 (8.87)              |                      |
| Change in lifestyle                 | n†                                             |                      | n                        |                      |
| <b>Change in AHEI</b>               |                                                |                      |                          |                      |
| Low to high                         | 2,090                                          | -3.01 (-3.41, -2.61) | 141                      | -4.73 (-6.69, -2.76) |
| Low to medium                       | 7,919                                          | -0.25 (-0.43, -0.08) | 550                      | -1.28 (-2.04, -0.52) |
| Medium to high                      | 6,781                                          | -0.90 (-1.08, -0.71) | 426                      | -0.81 (-1.59, -0.04) |
| Stay high                           | 13,899                                         | 0.46 (0.35, 0.57)    | 825                      | -0.19 (-0.67, 0.29)  |
| Stay medium                         | 12,609                                         | 1.06 (0.94, 1.18)    | 814                      | 0.60 (0.09, 1.11)    |
| Stay low                            | 20,105                                         | 1.64 (1.55, 1.73)    | 1,385                    | 1.64 (1.26, 2.02)    |
| Medium to low                       | 8,032                                          | 2.38 (2.21, 2.54)    | 597                      | 2.30 (1.63, 2.96)    |
| High to medium                      | 6,855                                          | 2.14 (1.96, 2.32)    | 420                      | 2.23 (1.49, 2.96)    |
| High to low                         | 1,791                                          | 3.55 (3.17, 3.93)    | 107                      | 3.81 (2.16, 5.45)    |
| <b>Change in physical activity</b>  |                                                |                      |                          |                      |
| Increase                            | 7,499                                          | 0.39 (0.21, 0.56)    | 529                      | -0.50 (-1.22, 0.22)  |
| Stay high                           | 45,177                                         | 0.60 (0.54, 0.67)    | 2,769                    | 0.36 (0.08, 0.64)    |
| Stay low                            | 19,963                                         | 1.62 (1.52, 1.71)    | 1,470                    | 1.21 (0.81, 1.61)    |
| Decrease                            | 7,442                                          | 2.16 (1.99, 2.33)    | 497                      | 2.21 (1.50, 2.93)    |
| <b>Status of alcohol drinking‡</b>  |                                                |                      |                          |                      |
| Non-drinker                         | 25,460                                         | 1.12 (1.04, 1.21)    | 1,960                    | 1.00 (0.67, 1.34)    |
| Recent starter                      | 6,994                                          | 0.93 (0.74, 1.12)    | 493                      | -0.17 (-0.90, 0.56)  |
| Recent quitter                      | 5,383                                          | 0.75 (0.53, 0.98)    | 378                      | 0.48 (-0.50, 1.45)   |
| Stable drinker                      | 16,864                                         | 1.07 (0.93, 1.22)    | 914                      | 0.58 (0.03, 1.14)    |
| Drinker with increasing consumption | 14,610                                         | 0.87 (0.77, 0.97)    | 856                      | 0.75 (0.25, 1.25)    |

|                                     |        |                      |       |                      |
|-------------------------------------|--------|----------------------|-------|----------------------|
| Drinker with decreasing consumption | 7,542  | 0.97 (0.86, 1.08)    | 470   | 0.36 (-0.16 to 0.87) |
| <b>Change in smoking status</b>     |        |                      |       |                      |
| Never smoker                        | 52,148 | 0.96 (0.91, 1.01)    | 3,462 | 0.67 (0.44, 0.91)    |
| Recent starter                      | 127    | 0.34 (-1.11, 1.80)   | 12    | -0.37 (-4.22, 3.49)  |
| Past smoker                         | 21,321 | 1.04 (0.95, 1.12)    | 1,394 | 0.52 (0.12, 0.92)    |
| Re-starter                          | 744    | -1.10 (-1.65, -0.54) | 42    | -0.34 (-3.90, 3.22)  |
| Recent quitter                      | 1,536  | 3.61 (3.18, 4.04)    | 109   | 4.21 (2.68, 5.73)    |
| Continued smoker                    | 4,205  | 0.39 (0.19, 0.58)    | 246   | 0.44 (-0.45, 1.33)   |

Abbreviations: AHEI, Alternate Healthy Eating Index; BMI, body mass index; CI, confidence interval; GDM, gestational diabetes mellitus; HRT, hormonal replacement therapy; LS, least squares.

\* LS means of weight change were modeled in the multivariable marginal models with generalized estimating equations adjusting for follow-up period, race (white, non-white), marital status (ever married, others), family history of diabetes (yes, no), baseline age (years), BMI (kg/m<sup>2</sup>), oral contraceptive use (current, past, never), menopausal and HRT use status (premenopausal never HRT use, postmenopausal never HRT use, postmenopausal current HRT use, postmenopausal past HRT use, missing), sleep duration (≤6 hours, 7-8 hours, >8 hours), and concurrent changes in other lifestyles.

† There was a total of 5,265 and 80,081 4-year observations from GDM and non-GDM women with BMI ≥25 kg/m<sup>2</sup>, respectively, during follow-up period. Number of observations for each change category was presented within status of GDM history.

‡ AHEI without component of alcohol was adjusted in the models for change in alcohol consumption.



**Supplementary Table 5.** Joint associations of 4-year change in diet and physical activity with weight change restricting to women with baseline BMI  $\geq 25$  kg/m<sup>2</sup>, stratified by history of GDM (other results not shown)

| Joint AHEI and PA |           | LS means of 4-year weight change (kg), 95% CI* |                      |                          |                       |
|-------------------|-----------|------------------------------------------------|----------------------|--------------------------|-----------------------|
|                   |           | No history of GDM (n=30,180)                   |                      | History of GDM (n=2,067) |                       |
| AHEI              | PA        | n <sup>†</sup>                                 |                      | n                        |                       |
| Low to high       | Increase  | 225                                            | -5.09 (-6.49, -3.70) | 21                       | -6.92 (-10.85, -2.99) |
| Low to high       | Stay high | 1,238                                          | -2.90 (-3.40, -2.41) | 76                       | -5.65 (-8.55, -2.75)  |
| High to low       | Stay low  | 455                                            | 4.63 (3.78, 5.48)    | 29                       | 4.86 (1.96, 7.76)     |
| High to low       | Decrease  | 199                                            | 4.50 (3.19, 5.82)    | 15                       | 3.54 (-1.29, 8.38)    |

Abbreviations: AHEI, Alternate Healthy Eating Index; BMI, body mass index; GDM, gestational diabetes mellitus; HRT, hormonal replacement therapy; LS, least squares; PA, physical activity.

\* LS means of weight change were modeled in the multivariable marginal models with generalized estimating equations adjusting for follow-up period, race (white, non-white), marital status (ever married, others), family history of diabetes (yes, no), baseline age (years), BMI (kg/m<sup>2</sup>), oral contraceptive use (current, past, never), menopausal and HRT use status (premenopausal never HRT use, postmenopausal never HRT use, postmenopausal current HRT use, postmenopausal past HRT use, missing), sleep duration ( $\leq 6$  hours, 7-8 hours,  $> 8$  hours), and categorical change in smoking status.

<sup>†</sup> There was a total of 5,265 and 80,081 4-year observations from GDM and non-GDM women with BMI  $\geq 25$  kg/m<sup>2</sup>, respectively, during follow-up period. Number of observations for each joint change category was presented within status of GDM history.

**Supplemental Figure 1.** Trends in diet quality (AHEI), physical activity, alcohol consumption, and current smoking (%) by history of GDM during study follow-up

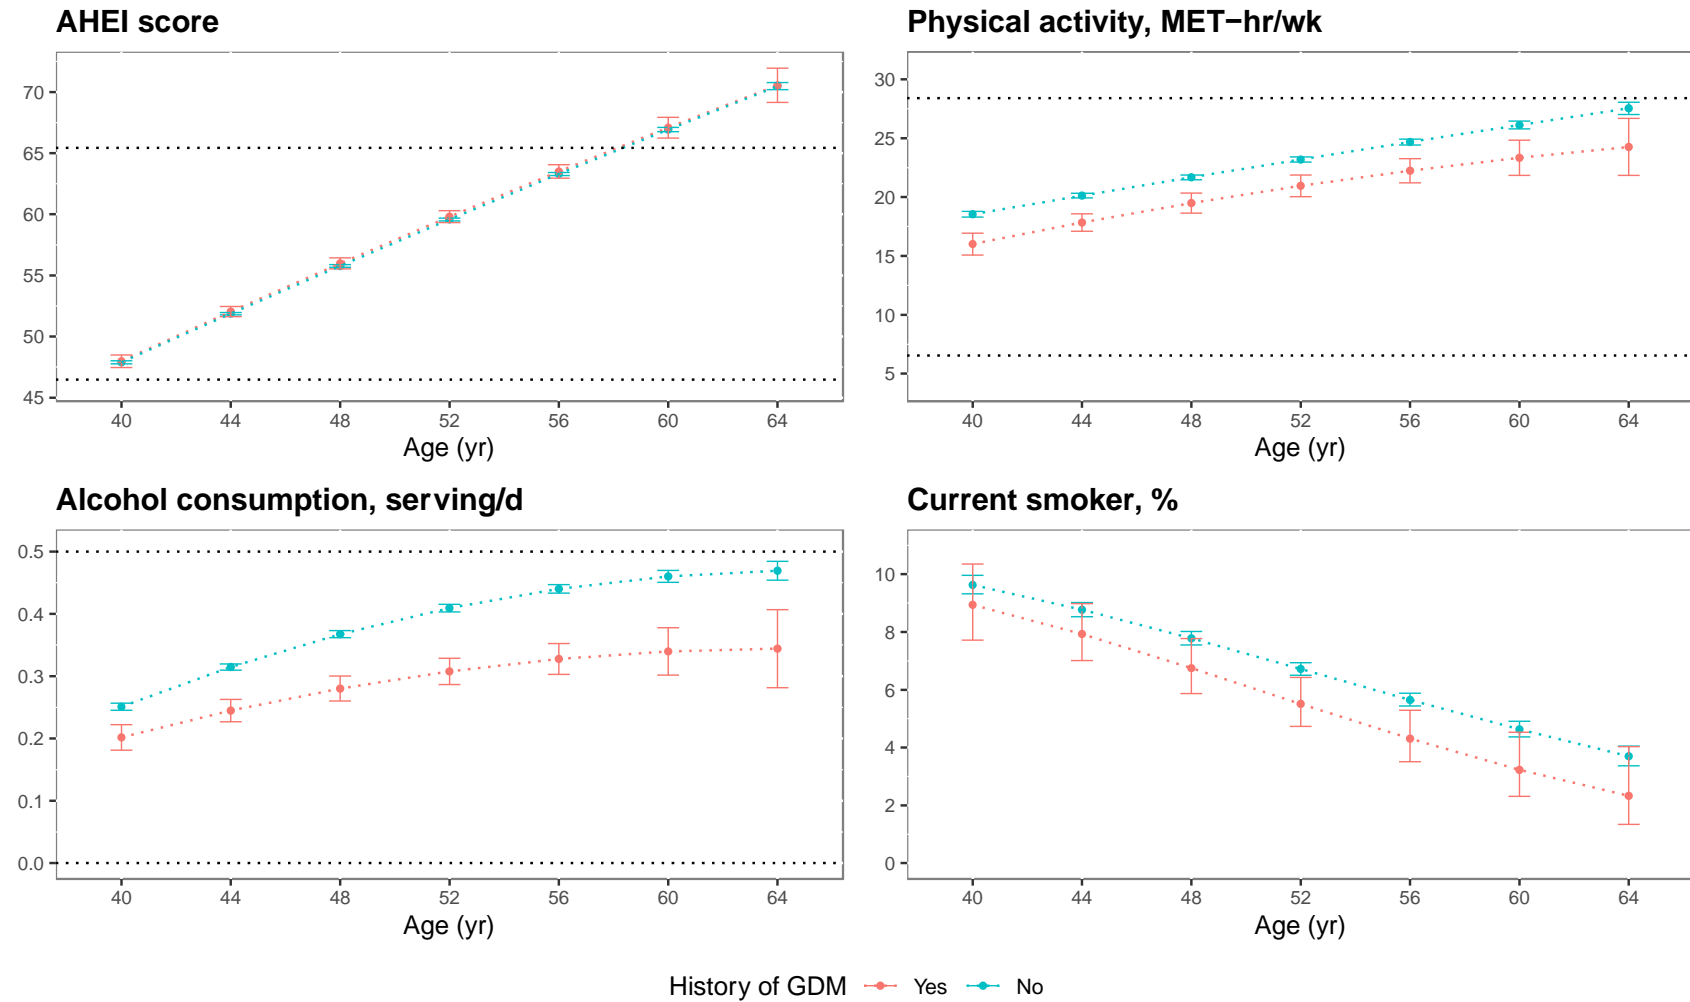

Supplement: Supplementary file 1 [file 31455580]
